# Supplementary material
Source: publisher figshare collection journal article supplement (https://acs.figshare.com/ndownloader/files/5025244)
Supplement: Supplementary file 1 [file 5025244]

# **Development and design of a new single-stage cryogenic modulator for comprehensive two dimensional gas chromatography (GC×GC)**

Ahmed Mostafa<sup>a,b</sup> and Tadeusz Górecki<sup>a</sup>

<sup>a</sup> Department of Chemistry, University of Waterloo, 200 University Avenue West, Waterloo, Ontario, N2L 3G1, Canada.

<sup>b</sup> Department of Pharmaceutical Chemistry, College of Clinical Pharmacy, University of Dammam, Dammam, Eastern Province, KSA

## **Supporting information**

### **Table of contents**

Figure S1: *n*-pentane peak modulation using 100 µm I.D. deactivated fused silica capillary showing characteristic chair-shape peak due to breakthrough (~ 30% of peak height).

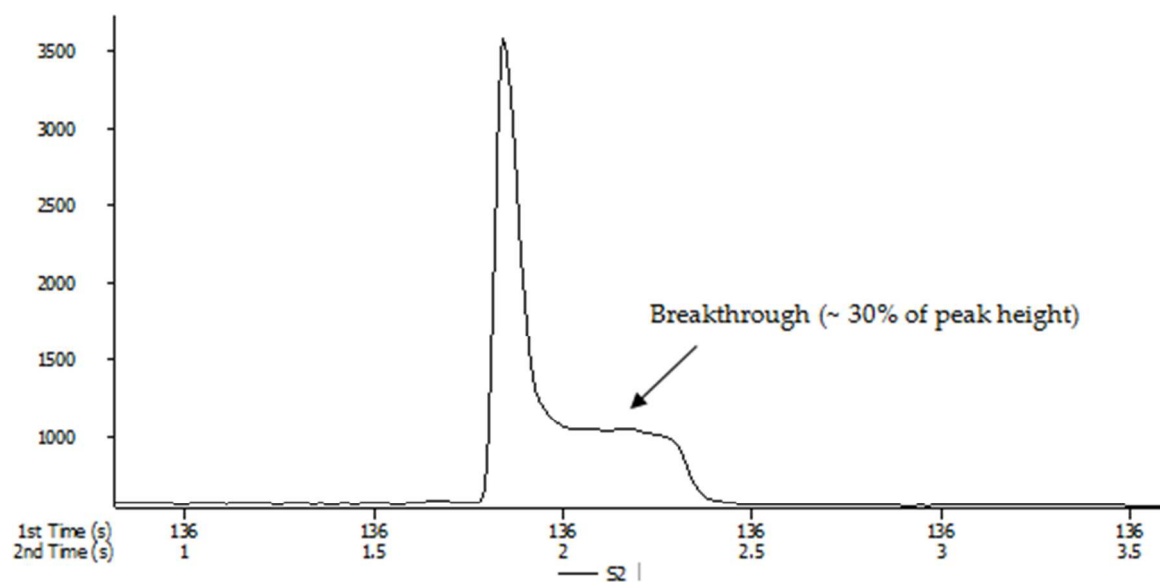

**Figure S1:** *n*-pentane peak modulation using 100  $\mu\text{m}$  I.D. deactivated fused silica capillary showing characteristic chair-shape peak due to breakthrough.
